# Supplementary material
Source: Springer Nature journal article supplement (https://www.springermedizin.de/resource/supplementary/13046_2011_497_MOESM6_ESM.pdf/9662360)

**A**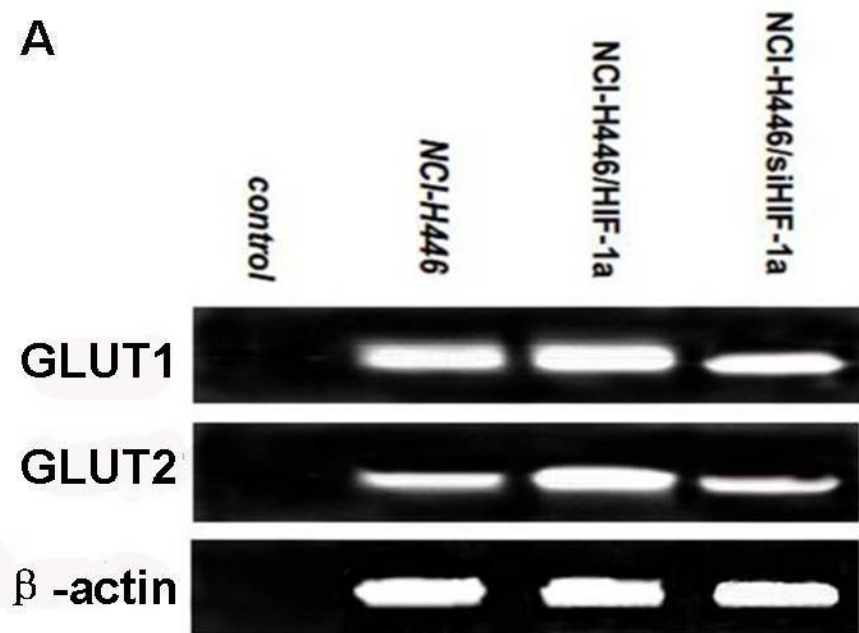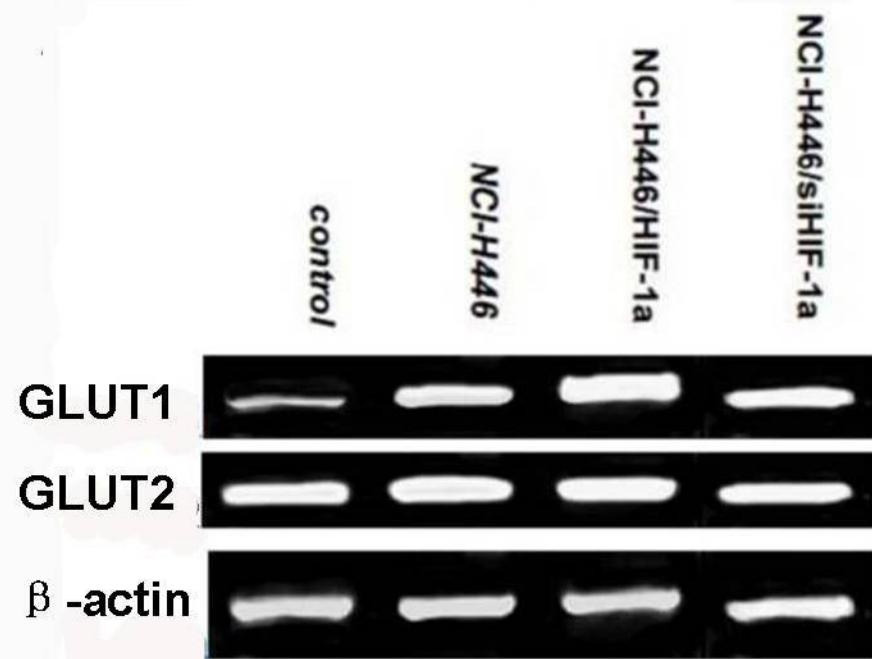

1 2 3 4

1 2 3 4

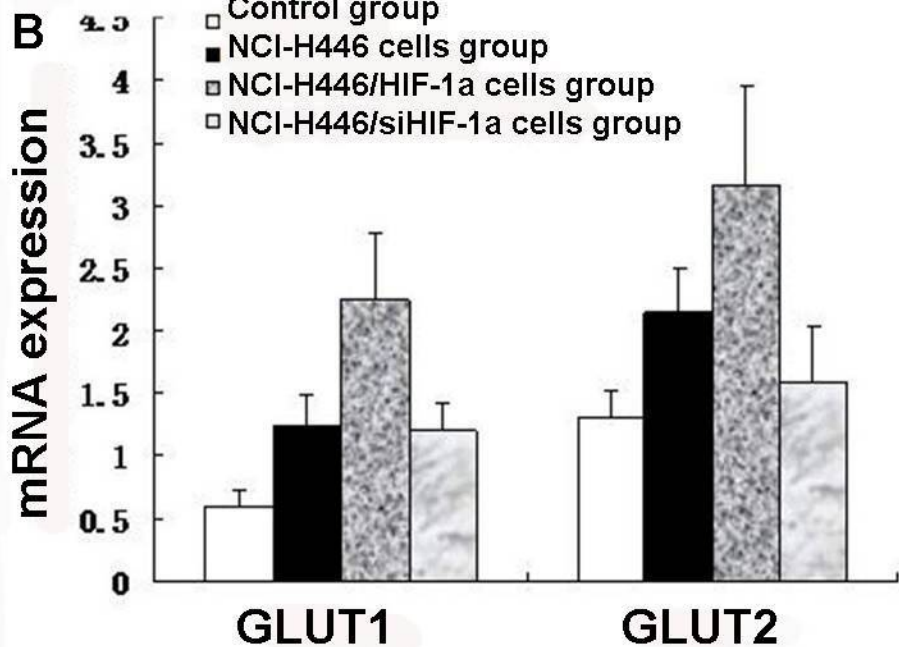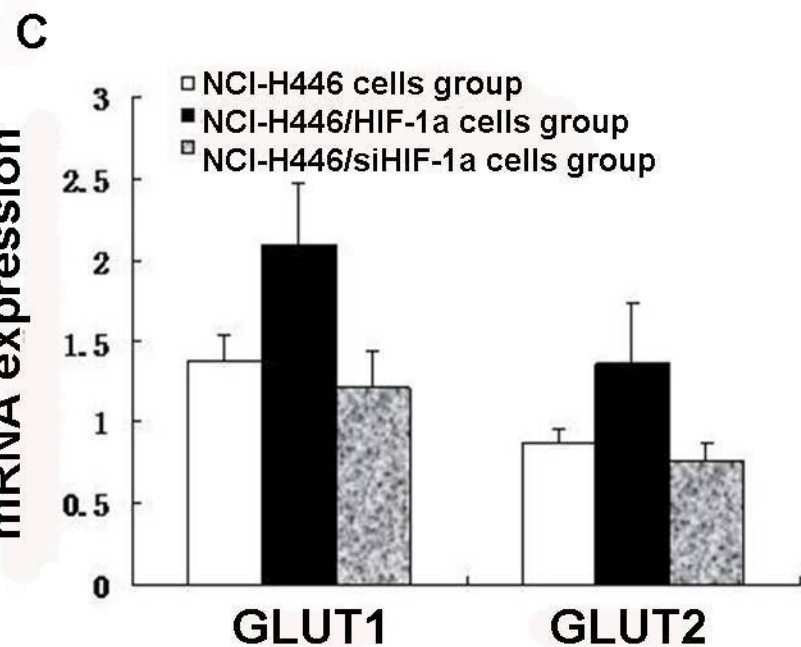

Supplement: MOESM6 [file 9662360]
